# Supplementary material for: Modest additive effects of integrated vector control measures on malaria prevalence and transmission in western Kenya
Source: PubMed Central journal article supplement (PMC3722122; doi:10.1186/1475-2875-12-256), 2013-07-19
Supplement: 1475-2875-12-256-S3.pdf [file 1475-2875-12-256-S3.pdf]

**Additional file 3: Results of analysis of variance and backfitting model of mosquito densities.**

Table S3a. Categorical values encountered during processing.

|                   |                                                                                          |
|-------------------|------------------------------------------------------------------------------------------|
| Site (3 levels)   | Emakhaha/Mbale , Emutete, Iguhu                                                          |
| Season (3 levels) | Prior intervention (February/March) , Post intervention (May), Late season (July/August) |
| ICON (2 levels)   | Applied (yes), not applied (no)                                                          |
| ITN (2 levels)    | With ITN (yes), without ITN (no)                                                         |

**2010 Data**

Table S3b. Analysis of variance – full model. Dependent variable: anopheles adult density (female/house/night) in 2010. See Table S3a for independent variable descriptions.

| Source               | SS      | df  | MS      | F      | P     |
|----------------------|---------|-----|---------|--------|-------|
| CONSTANT             | 100.832 | 1   | 100.832 | 63.772 | 0.000 |
| SITE                 | 26.828  | 2   | 13.414  | 8.484  | 0.000 |
| SEASON               | 2.314   | 2   | 1.157   | 0.732  | 0.483 |
| ICON                 | 5.465   | 1   | 5.465   | 3.457  | 0.065 |
| ITN                  | 4.703   | 1   | 4.703   | 2.974  | 0.087 |
| SITE*SEASON          | 2.336   | 4   | 0.584   | 0.369  | 0.830 |
| SITE*ICON            | 19.101  | 2   | 9.551   | 6.040  | 0.003 |
| SITE*ITN             | 1.627   | 2   | 0.814   | 0.515  | 0.599 |
| SEASON*ICON          | 0.784   | 2   | 0.392   | 0.248  | 0.781 |
| SEASON*ITN           | 1.855   | 2   | 0.928   | 0.587  | 0.558 |
| ICON*ITN             | 0.225   | 1   | 0.225   | 0.143  | 0.706 |
| SITE*SEASON*ICON     | 2.963   | 4   | 0.741   | 0.468  | 0.759 |
| SITE*SEASON*ITN      | 1.437   | 4   | 0.359   | 0.227  | 0.923 |
| SITE*ICON*ITN        | 1.167   | 2   | 0.583   | 0.369  | 0.692 |
| SEASON*ICON*ITN      | 1.153   | 2   | 0.576   | 0.365  | 0.695 |
| SITE*SEASON*ICON*ITN | 6.012   | 4   | 1.503   | 0.951  | 0.437 |
| Error                | 207.129 | 131 | 1.581   |        |       |

Table S3c. Parameter estimates after backfitting selection at significance level of 0.05. Dependent variable: anopheles adult density (female/house/night) in 2010. See Table S3a for independent variable descriptions.

| Term | Estimate | Std Error | t Ratio | Prob> t |
|------|----------|-----------|---------|---------|
|------|----------|-----------|---------|---------|

|                                     |        |       |       |        |
|-------------------------------------|--------|-------|-------|--------|
| Intercept                           | 0.690  | 0.102 | 6.760 | <.0001 |
| Site (Mbale vs. Emutete & Iguhu)    | 0.371  | 0.102 | 3.650 | 0.000  |
| Site (Emutete vs. Iguhu)            | 0.203  | 0.116 | 1.750 | 0.083  |
| ICON (yes)                          | -0.243 | 0.095 | 2.560 | 0.011  |
| Site (Iguhu vs. Emutete)*ICON (yes) | -0.406 | 0.115 | 3.520 | 0.001  |

## 2011 data

Table S3d. Analysis of variance – full model. Dependent variable: anopheles adult density (female/house/night) in 2011. See Table S3a for independent variable descriptions.

| Source               | SS     | df  | MS    | F      | P     |
|----------------------|--------|-----|-------|--------|-------|
| CONSTANT             | 8.463  | 1   | 8.463 | 74.501 | 0.000 |
| SITE                 | 2.894  | 2   | 1.447 | 12.738 | 0.000 |
| SEASON               | 1.721  | 2   | 0.860 | 7.573  | 0.001 |
| ICON                 | 0.042  | 1   | 0.042 | 0.366  | 0.546 |
| ITN                  | 0.174  | 1   | 0.174 | 1.533  | 0.218 |
| SITE*SEASON          | 1.058  | 4   | 0.264 | 2.328  | 0.061 |
| SITE*ICON            | 0.080  | 2   | 0.040 | 0.352  | 0.704 |
| SITE*ITN             | 0.080  | 2   | 0.040 | 0.352  | 0.704 |
| SEASON*ICON          | 0.177  | 2   | 0.088 | 0.779  | 0.462 |
| SEASON*ITN           | 0.742  | 2   | 0.371 | 3.265  | 0.042 |
| ICON*ITN             | 0.022  | 1   | 0.022 | 0.195  | 0.660 |
| SITE*SEASON*ICON     | 0.168  | 4   | 0.042 | 0.369  | 0.830 |
| SITE*SEASON*ITN      | 0.465  | 4   | 0.116 | 1.023  | 0.399 |
| SITE*ICON*ITN        | 0.157  | 2   | 0.079 | 0.692  | 0.503 |
| SEASON*ICON*ITN      | 0.012  | 2   | 0.006 | 0.051  | 0.950 |
| SITE*SEASON*ICON*ITN | 0.087  | 4   | 0.022 | 0.192  | 0.942 |
| Error                | 11.701 | 103 | 0.114 |        |       |

Table S3e. Parameter estimates after backfitting selection at significance level of 0.05. Dependent variable: anopheles adult density (female/house/night) in 2011. See Table S3a for independent variable descriptions.

| Term                                | Std      |       | t Ratio | Prob> t |
|-------------------------------------|----------|-------|---------|---------|
|                                     | Estimate | Error |         |         |
| Intercept                           | 0.339    | 0.030 | 11.230  | <.0001  |
| Site (Emutete & Emakhaha vs. Iguhu) | 0.136    | 0.029 | 4.700   | <.0001  |
| Site (Emutete vs. Emakhaha)         | 0.080    | 0.034 | 2.370   | 0.019   |

|                                                            |        |       |       |       |
|------------------------------------------------------------|--------|-------|-------|-------|
| Season (Post & Late vs. Prior)                             | 0.111  | 0.029 | 3.860 | 0.000 |
| ITN (yes)                                                  | -0.041 | 0.027 | 1.480 | 0.140 |
| Site (Emutete vs. Emakhaha)*Season (Post & Late vs. Prior) | -0.082 | 0.035 | 2.310 | 0.023 |
| Season (Post & Late vs. Prior)*ITN (yes)                   | -0.075 | 0.029 | 2.610 | 0.010 |

---
